# Supplementary material for: All Groups Are Not Created Equal: Class-Based Learning Communities Enhance Exam Performance and Reduce Gaps
Source: Atypon-hosted journal article supplement (doi:10.1187/cbe.21-09-0240), 2022-08-22
Supplement: cbe-cbe-21-09-0240-s05.pdf [file cbe-cbe-21-09-0240-s05.pdf]

# What makes a group effective?

---

Building an effective team is not only a matter of chance!

We can *choose* to build better teams

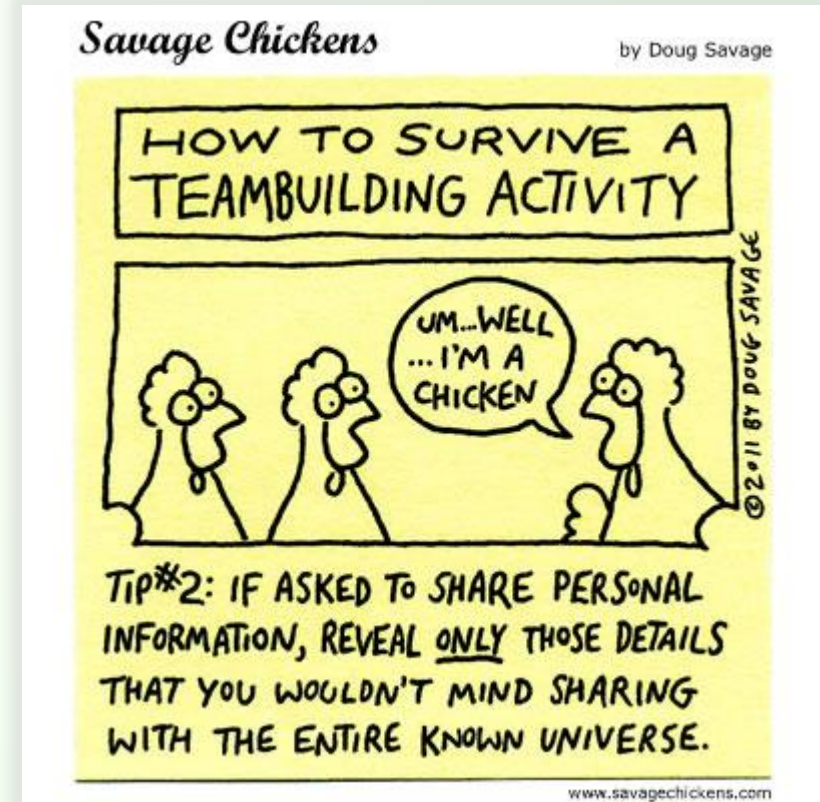

# What does the research say?

---

*“Who is on a team matters less than how the team members interact, structure their work, and view their contributions”*

**You** decide if your team works well together

**Your actions** together determine if your team is beneficial

How to work effectively in team: **Critical** to success in every field

# What does the research say: The How

---

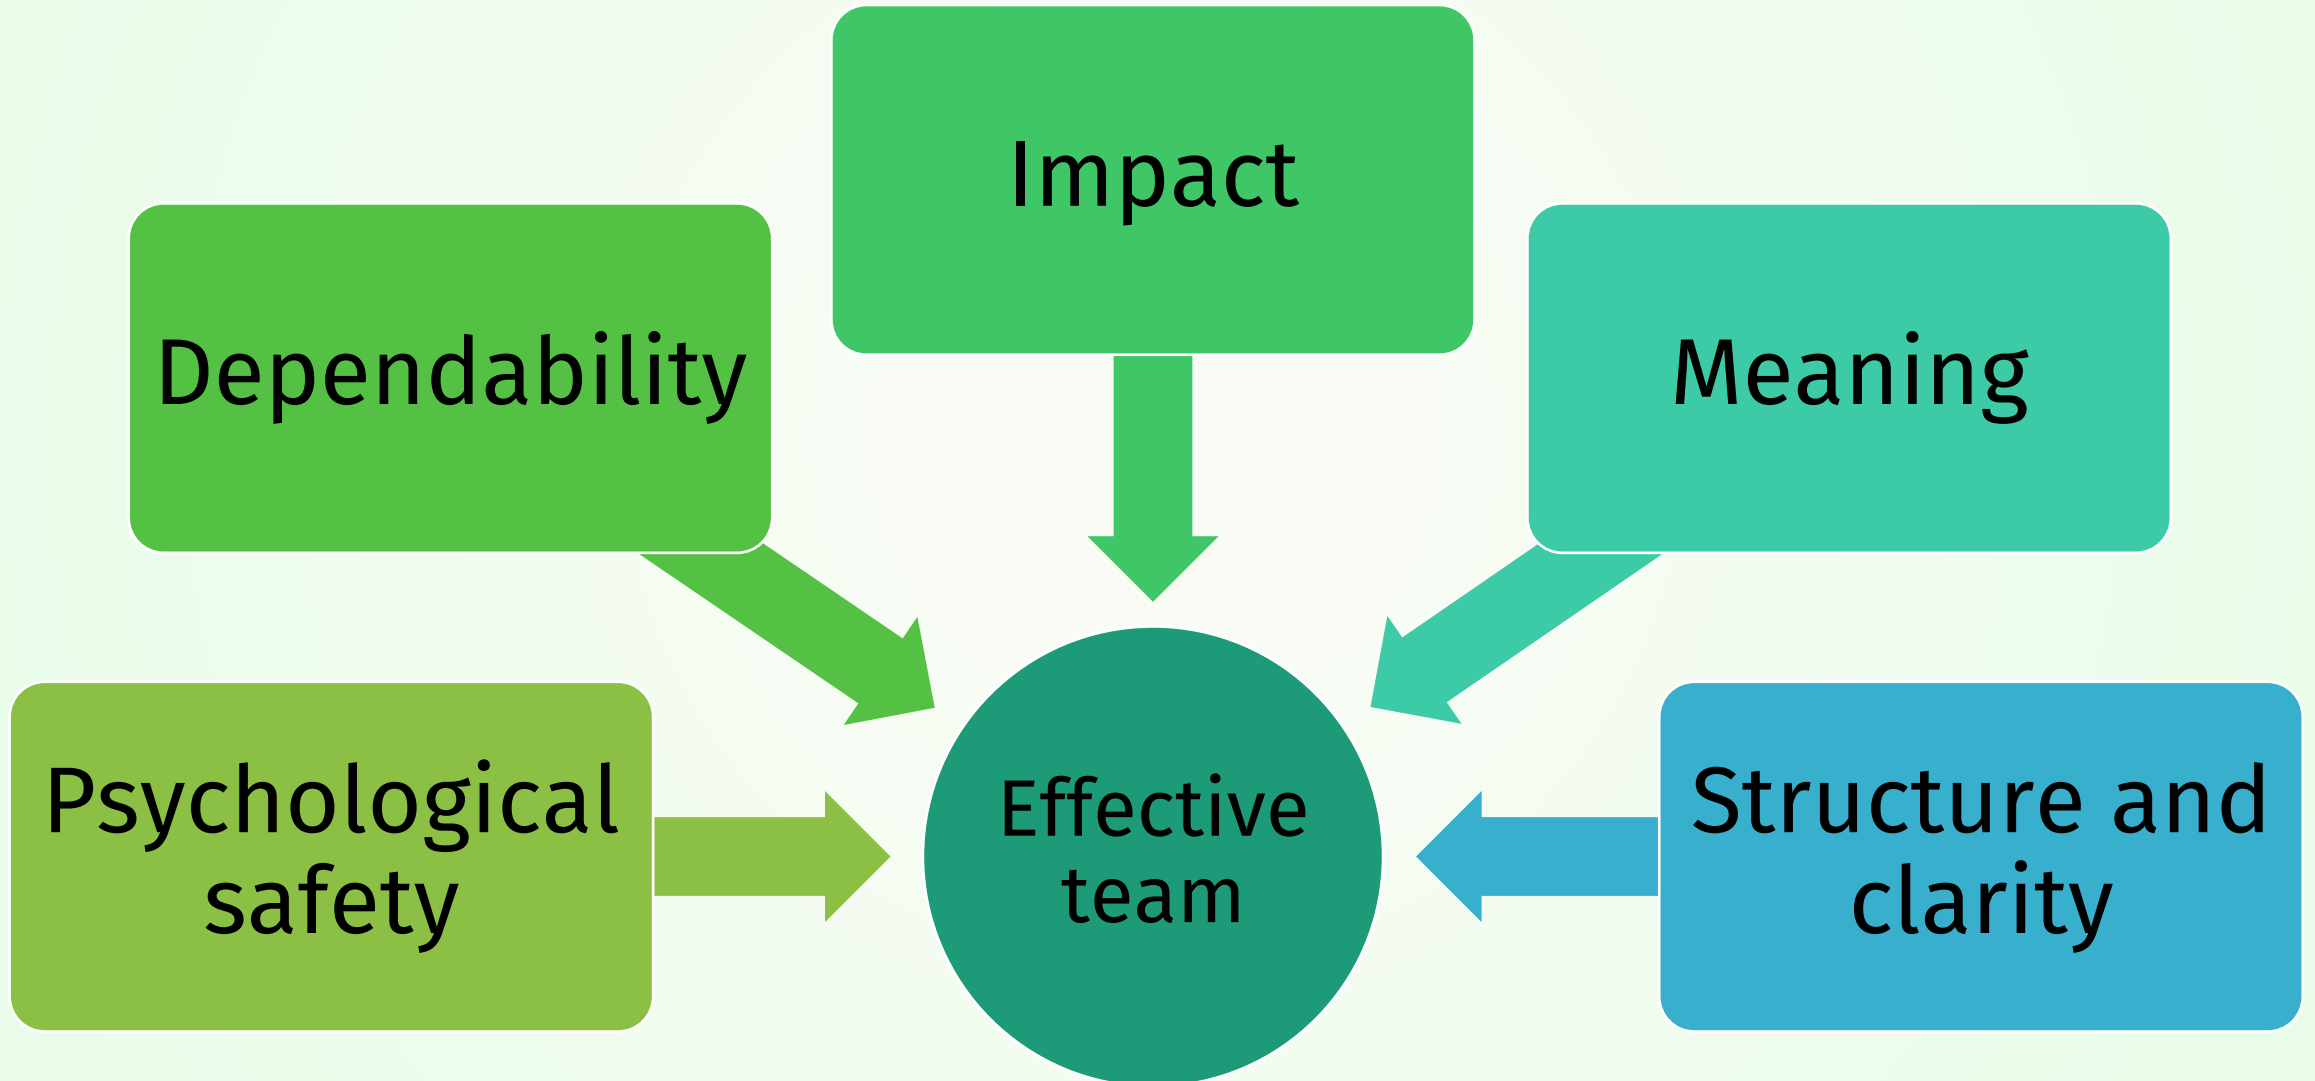

# Psychological safety is key

---

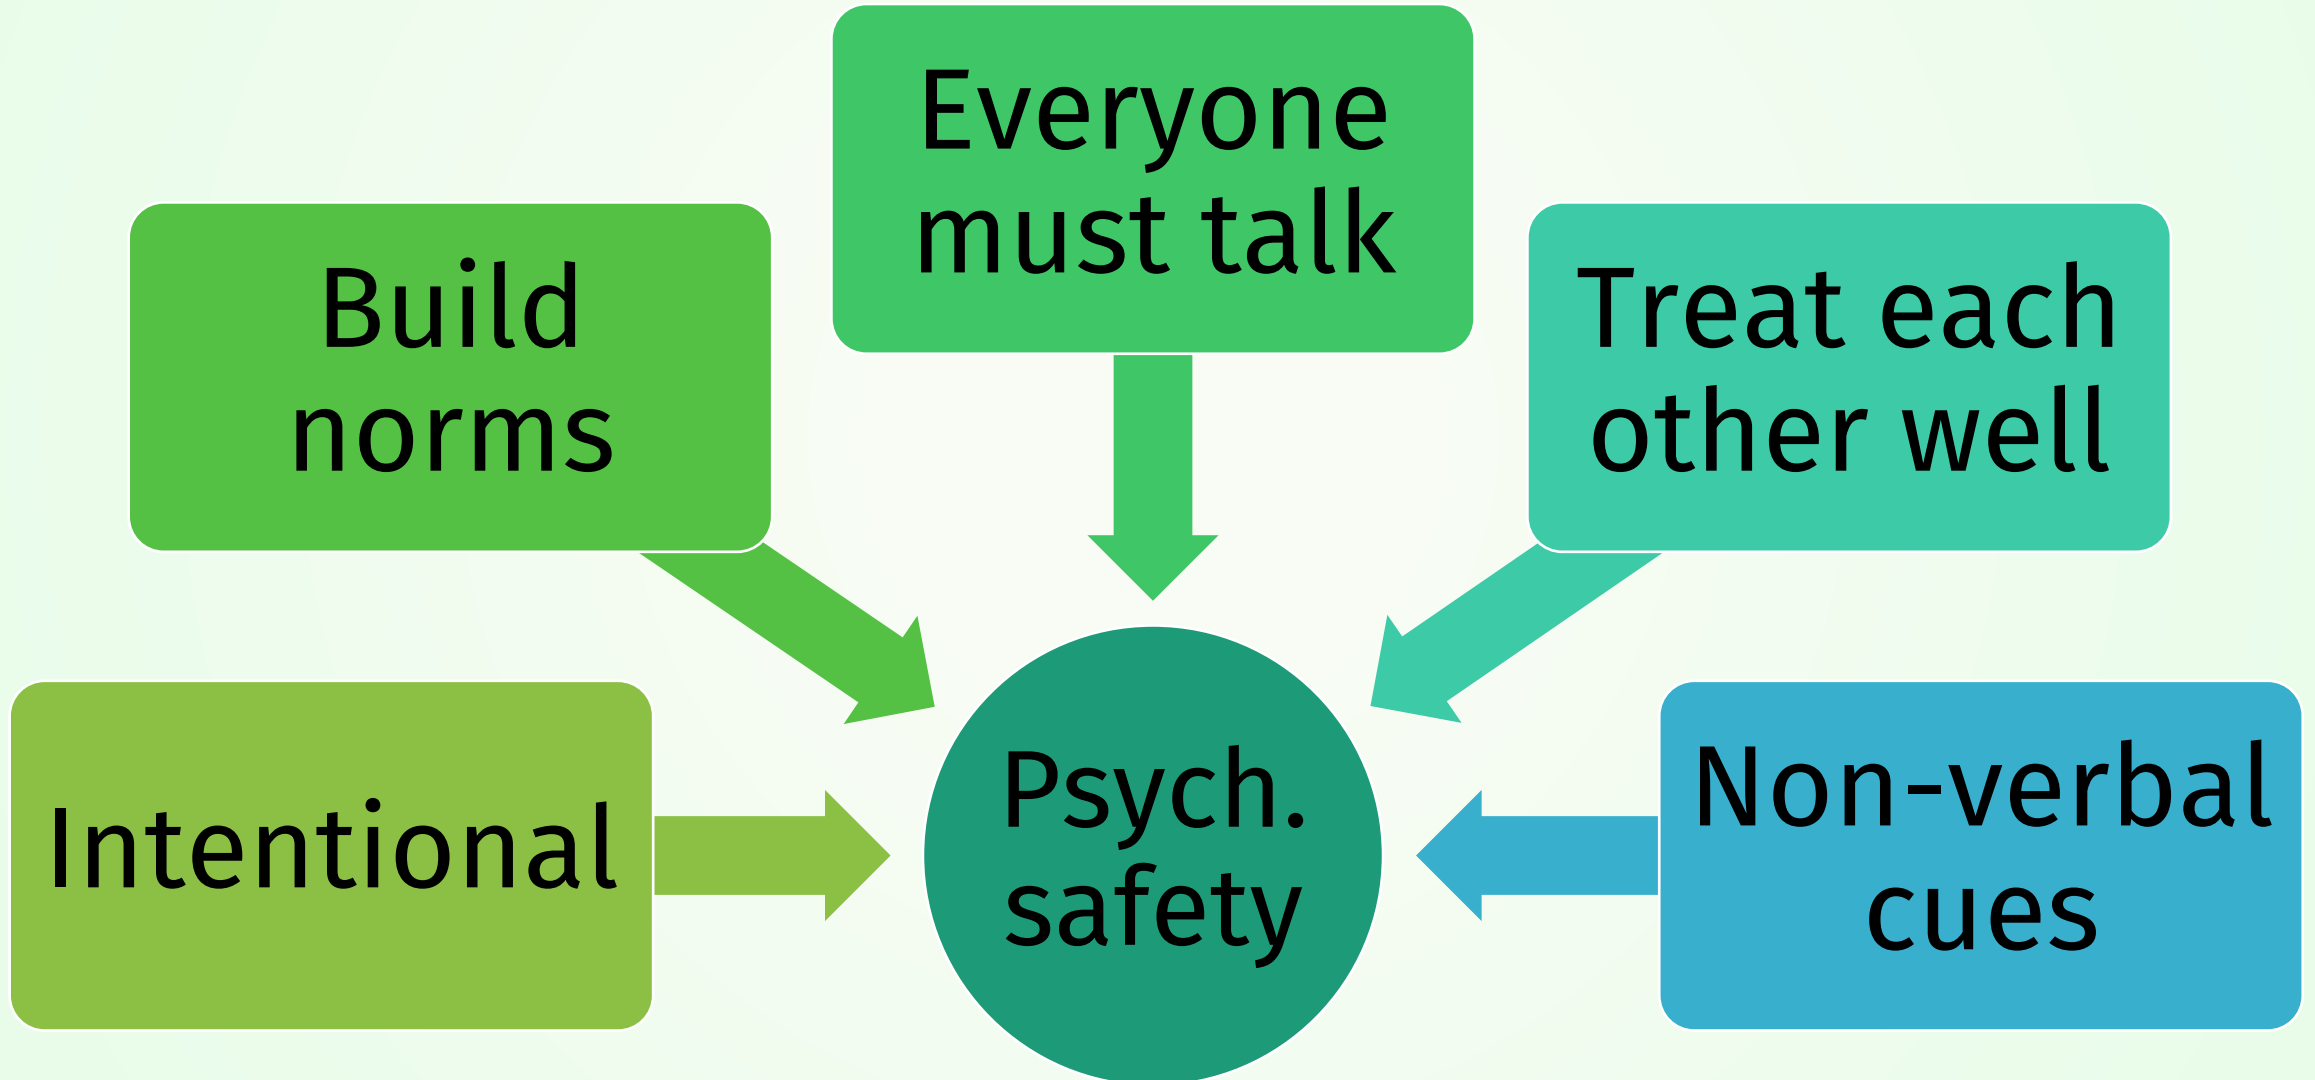

# Additional resources

---

<https://www.nytimes.com/2016/02/28/magazine/what-google-learned-from-its-quest-to-build-the-perfect-team.html>

<https://www.youtube.com/watch?v=LhoLuui9gX8&feature=youtu.be>

<https://rework.withgoogle.com/guides/understanding-team-effectiveness/steps/introduction/>

# Assignment #1

---

“Meet” with your group sometime early in week #1

Complete the assignment and submit it by the deadline

Suggestions:

- Introduce yourselves
- Discuss group norms
- How do you make sure everyone participates

# Assignment #1

---

No page limits, etc.

Completion points only

Trusting each of you to do a good job; this is going to set the tone

# Link to video

---

<https://uci.yuja.com/V/Video?v=2838661&node=9967784&a=902968460&autoplay=1>
