# Supplementary material for: All Groups Are Not Created Equal: Class-Based Learning Communities Enhance Exam Performance and Reduce Gaps
Source: Atypon-hosted journal article supplement (doi:10.1187/cbe.21-09-0240), 2022-08-22
Supplement: combinedsupmats.pdf [file combinedsupmats.pdf]

# Supplemental Material

*CBE—Life Sciences Education*

Chi and Kadandale

**Example GLM with no interaction terms:**

```
glm(Score ~ CLC status +  
Minoritized Status + First Generation Status +  
Transfer Student status + Sex +  
Low income status + GPA)
```

**Example GLM with interaction terms:**

```
glm(Score ~ CLC status +  
Minoritized Status + First Generation Status +  
Transfer Student status + Sex +  
Low income status + GPA + CLC*GPA)
```

**Figure S1: Examples of formulae used for GLMs.** Top panel shows an example formula for a GLM with no interaction terms, while the bottom panel shows an example where the effect of an interaction between GPA and participation in a CLC is assessed.

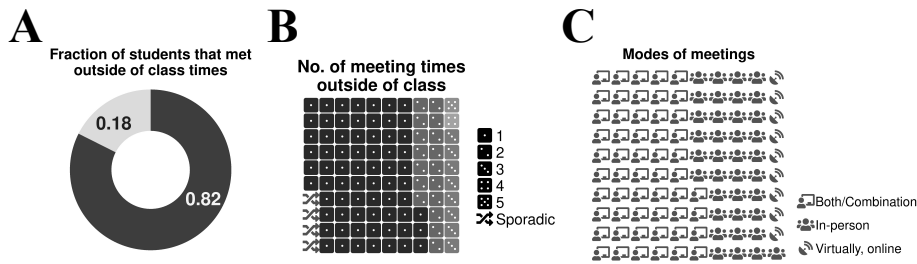

**Figure S2: Results of survey data about CLC participation from 2019.** (A) Fraction of students who met with their CLCs outside of class times at least once. (B) Number of times that students met with their CLCs per week in some format. (C) Modalities that students used to meet with their CLCs.

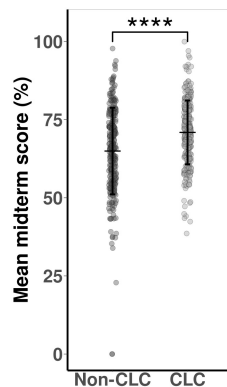

**Figure S3: Overall exam performance of CLC versus Non-CLC students in 2019.** \* = pValue < 0.01. Horizontal line shows the mean, and vertical lines show standard deviation. n=270 for Non-CLC and n=295 for CLC.

| <b>Demographic variable</b> | <b>2019</b>     |                | <b>2020</b>     |                |
|-----------------------------|-----------------|----------------|-----------------|----------------|
|                             | <b>Estimate</b> | <b>p-Value</b> | <b>Estimate</b> | <b>p-Value</b> |
| CLC                         | 4.460           | 0.000          | 2.282           | 0.005          |
| Cummulative GPA             | 12.367          | 0.000          | 11.585          | 0.000          |
| Minoritized student         | -1.297          | 0.014          | -2.983          | 0.000          |
| Sex: Female                 | -2.913          | 0.001          | -2.111          | 0.005          |
| Low Income                  | -2.145          | 0.027          | -0.288          | 0.718          |
| First Generation            | -0.207          | 0.827          | -1.113          | 0.201          |
| Transfer student            | -1.806          | 0.144          | -0.050          | 0.962          |

**Table S1: Coefficients for GLM models estimating effects of various demographic variables on student performance.** Similar trends are seen in both years, with CLC students performing better than Non-CLC students, even when accounting for demographic differences.

**Model for effect of  $x_1$  and  $x_2$  on Y with interaction between  $x_1$  and  $x_2$**

$$Y = \beta_0 + \beta_1x_1 + \beta_2x_2 + \beta_3(x_1*x_2)$$

**Effect of 1 unit change in  $x_1$  on Y**

$$\beta_1 + \beta_3*x_2$$

**Effect of 1 unit change in  $x_2$  on Y**

$$\beta_2 + \beta_3*x_1$$

**Figure S4: Derivation of equations to estimate effects of variables when considering interactions between the variables.** The example model shown estimates the effects of two interacting variables,  $x_1$  and  $x_2$  on the outcome variable, Y. From a GLM,  $\beta_1$  is the coefficient for  $x_1$ ,  $\beta_2$  is the coefficient for  $x_2$ , and  $\beta_3$  is the coefficient for the interaction between  $x_1$  and  $x_2$ .

| <b>Demographic variable</b> | <b>2019</b>     |                | <b>2020</b>     |                |
|-----------------------------|-----------------|----------------|-----------------|----------------|
|                             | <b>Estimate</b> | <b>p-Value</b> | <b>Estimate</b> | <b>p-Value</b> |
| CLC                         | 2.619           | 0.016          | 0.591           | 0.572          |
| Cummulative GPA             | 12.385          | 0.000          | 11.332          | 0.000          |
| Minoritized student         | -3.648          | 0.004          | -5.837          | 0.000          |
| Sex: Female                 | -2.825          | 0.002          | -1.534          | 0.045          |
| Low Income                  | -2.064          | 0.032          | -1.323          | 0.136          |
| First Generation            | -0.298          | 0.752          | -0.330          | 0.685          |
| Transfer student            | -2.015          | 0.102          | -0.388          | 0.717          |
| Group*Minoritized student   | 4.376           | 0.009          | 3.588           | 0.034          |

**Table S2: Coefficients for GLM models estimating the interaction effect between CLC and minoritized student status.** Similar trends are seen in both years, with minoritized student status interacting significantly with participation in a CLC.

| <b>Demographic variable</b> | <b>2019</b>     |                | <b>2020</b>     |                |
|-----------------------------|-----------------|----------------|-----------------|----------------|
|                             | <b>Estimate</b> | <b>p-Value</b> | <b>Estimate</b> | <b>p-Value</b> |
| CLC                         | 17.607          | 0.001          | 14.500          | 0.016          |
| Cummulative GPA             | 14.379          | 0.000          | 14.240          | 0.000          |
| Minoritized student         | -1.391          | 0.111          | -3.128          | 0.000          |
| Sex: Female                 | -3.033          | 0.001          | -1.637          | 0.032          |
| Low Income                  | -2.234          | 0.020          | -1.456          | 0.102          |
| First Generation            | -0.150          | 0.874          | -0.276          | 0.734          |
| Transfer student            | -1.826          | 0.137          | -0.362          | 0.736          |
| Group*CummulativeGPA        | -4.286          | 0.010          | -3.922          | 0.036          |

**Table S3: Coefficients for GLM models estimating the interaction effect between CLC and GPA.** Similar trends are seen in both years, with CLC participation reducing the predictive effect of GPA on overall student performance in the class.

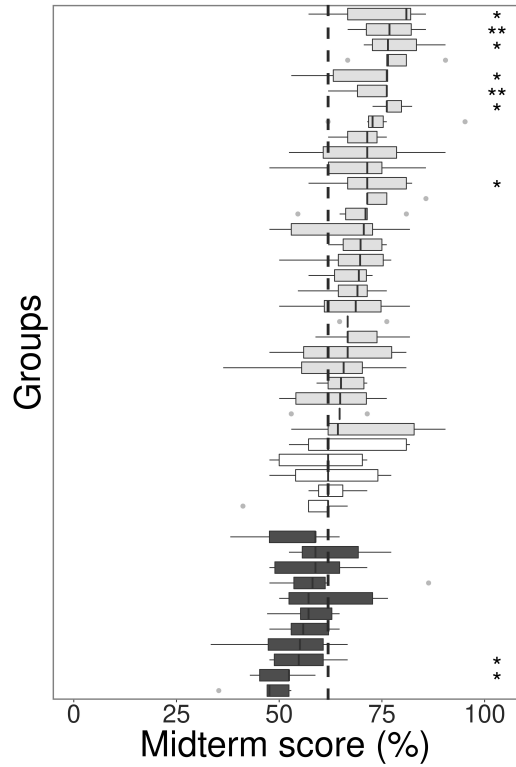

**Figure S5: Overall midterm score distribution for individual groups.** Overall midterm score distributions of each group are displayed in boxplots. Dashed line shows the median score of Non-CLC students for comparison. Light grey boxes indicate groups that had higher medians than the Non-CLC students, and dark grey boxes are groups that had lower medians than the Non-CLC students. Groups that did significantly better or worse than Non-CLC students are indicated by asterisks. \* = p-Value < 0.05, \*\* = p-Value < 0.01. P-values were derived from a Wilcoxon Rank Sum test comparing each group to the Non-CLC students, and adjusting for multiple comparisons. Data for the section not shown in the main paper is presented here.
